# Supplementary material for: Effectiveness of a digital medication event reminder and monitor device for patients with tuberculosis (SELFTB): a multicenter randomized controlled trial
Source: Springer Nature journal article supplement (doi:10.1186/s12916-022-02521-y), 2022-09-28
Supplement: MOESM3 [file 23548906]

## Baseline questionnaire for TB patients

|                                                                                                                                                                       |                                                                                                                                                                                                                                                                                                             |                                                                                                                                                                                                                                                                                        |                                                                                                                                                                                                                                                                                                         |  |
|-----------------------------------------------------------------------------------------------------------------------------------------------------------------------|-------------------------------------------------------------------------------------------------------------------------------------------------------------------------------------------------------------------------------------------------------------------------------------------------------------|----------------------------------------------------------------------------------------------------------------------------------------------------------------------------------------------------------------------------------------------------------------------------------------|---------------------------------------------------------------------------------------------------------------------------------------------------------------------------------------------------------------------------------------------------------------------------------------------------------|--|
| Participant ID: <input type="checkbox"/> <input type="checkbox"/> <input type="checkbox"/> <input type="checkbox"/> <input type="checkbox"/> <input type="checkbox"/> |                                                                                                                                                                                                                                                                                                             | Arm <input type="checkbox"/> SAT <input type="checkbox"/> DOT                                                                                                                                                                                                                          | Health Professional ID: <input type="checkbox"/> <input type="checkbox"/> <input type="checkbox"/> <input type="checkbox"/>                                                                                                                                                                             |  |
| <b>Demographics</b>                                                                                                                                                   |                                                                                                                                                                                                                                                                                                             |                                                                                                                                                                                                                                                                                        |                                                                                                                                                                                                                                                                                                         |  |
| Sex: <input type="checkbox"/> Male <input type="checkbox"/> Female                                                                                                    | Occupation:<br><input type="checkbox"/> No job <input type="checkbox"/> Housewife<br><input type="checkbox"/> Student <input type="checkbox"/> Government<br><input type="checkbox"/> Farmer <input type="checkbox"/> Daily laborer<br><input type="checkbox"/> Trader <input type="checkbox"/> Other ..... | Educational Level:<br><input type="checkbox"/> None <input type="checkbox"/> Elementary (0-8)<br><input type="checkbox"/> Secondary (9-10) <input type="checkbox"/> Preparatory (11-12)<br><input type="checkbox"/> University (Diploma) <input type="checkbox"/> University (≥Degree) |                                                                                                                                                                                                                                                                                                         |  |
| Age in years: <input type="checkbox"/> <input type="checkbox"/>                                                                                                       | Region .....                                                                                                                                                                                                                                                                                                | Zone/Sub-city .....                                                                                                                                                                                                                                                                    |                                                                                                                                                                                                                                                                                                         |  |
| Marital Status:<br><input type="checkbox"/> Married <input type="checkbox"/> Never<br><input type="checkbox"/> Divorced<br><input type="checkbox"/> Widower           | Whom you live with?<br><input type="checkbox"/> Alone <input type="checkbox"/> Family<br><input type="checkbox"/> Friends <input type="checkbox"/> Homeless<br><input type="checkbox"/> Other .....                                                                                                         | How many people live in the house including you?<br><input type="checkbox"/> ≤ 3 <input type="checkbox"/> 4-6<br><input type="checkbox"/> 7-9 <input type="checkbox"/> ≥ 10                                                                                                            | How many bedrooms are in the house?<br><input type="checkbox"/> 1 <input type="checkbox"/> 2<br><input type="checkbox"/> 3 <input type="checkbox"/> ≥4                                                                                                                                                  |  |
| Are you head of the household?<br><input type="checkbox"/> Yes <input type="checkbox"/> No                                                                            | Are you a permanent or temporary resident in Addis<br><input type="checkbox"/> Permanent <input type="checkbox"/> Tempo.                                                                                                                                                                                    | What is your average monthly income?<br>.....                                                                                                                                                                                                                                          | Distance from home to this health center<br>..... KM                                                                                                                                                                                                                                                    |  |
| <b>Behavioral</b>                                                                                                                                                     |                                                                                                                                                                                                                                                                                                             |                                                                                                                                                                                                                                                                                        |                                                                                                                                                                                                                                                                                                         |  |
| Smoking cigarettes per day<br><input type="checkbox"/> Never <input type="checkbox"/> 1-5<br><input type="checkbox"/> 6-10 <input type="checkbox"/> >10               | Use of Chat:<br><input type="checkbox"/> Never <input type="checkbox"/> 1/week<br><input type="checkbox"/> ≥2/week <input type="checkbox"/> 1/month                                                                                                                                                         | Drinking alcohol:<br><input type="checkbox"/> Never <input type="checkbox"/><br>>1/day;<br><input type="checkbox"/> 2-5/day <input type="checkbox"/> ≥6/day<br><input type="checkbox"/> Weekly <input type="checkbox"/> Rarely                                                         | Taking cocaine/marijuana<br><input type="checkbox"/> Never<br><input type="checkbox"/> Occasionally<br><input type="checkbox"/> Regularly, <5/day<br><input type="checkbox"/> Regularly, >5/day                                                                                                         |  |
| <b>From TB registration log</b>                                                                                                                                       |                                                                                                                                                                                                                                                                                                             |                                                                                                                                                                                                                                                                                        |                                                                                                                                                                                                                                                                                                         |  |
| HIV status:<br><input type="checkbox"/> Pos <input type="checkbox"/> Neg                                                                                              | If HIV+, currently on ARV<br><input type="checkbox"/> Yes <input type="checkbox"/> No                                                                                                                                                                                                                       | Weight in Kg .....                                                                                                                                                                                                                                                                     | Date TB treatment started (DD-MM-YY)<br>.....                                                                                                                                                                                                                                                           |  |
| Height in cm .....                                                                                                                                                    | .....                                                                                                                                                                                                                                                                                                       | .....                                                                                                                                                                                                                                                                                  | .....                                                                                                                                                                                                                                                                                                   |  |
| TB treatment status<br><input type="checkbox"/> new <input type="checkbox"/> relapse                                                                                  | TB tested positive using:<br><input type="checkbox"/> Microscopy<br><input type="checkbox"/> Xpert MTB/RIF                                                                                                                                                                                                  | If drug susceptibility test done, result<br><input type="checkbox"/> Susceptible<br><input type="checkbox"/> Resistant                                                                                                                                                                 | Place of diagnosis:<br><input type="checkbox"/> This facility<br><input type="checkbox"/> Another health center<br><input type="checkbox"/> Public hospital<br><input type="checkbox"/> NGO health facility<br><input type="checkbox"/> Private clinic/ hospital<br><input type="checkbox"/> Other..... |  |
| Date diagnosed as TB patient .....                                                                                                                                    | If microscopy, result was:<br><input type="checkbox"/> 1-9(Scanty) <input type="checkbox"/> 1+<br><input type="checkbox"/> 2+ <input type="checkbox"/> 3+                                                                                                                                                   | Have you ever treated                                                                                                                                                                                                                                                                  |                                                                                                                                                                                                                                                                                                         |  |
| Have you ever had TB treatment before?<br><input type="checkbox"/> Yes <input type="checkbox"/> No                                                                    | If yes: Have you completed your previous TB treatment?<br><input type="checkbox"/> Yes <input type="checkbox"/> No, why .....                                                                                                                                                                               |                                                                                                                                                                                                                                                                                        |                                                                                                                                                                                                                                                                                                         |  |
| <b>Study clinician signature</b>                                                                                                                                      |                                                                                                                                                                                                                                                                                                             |                                                                                                                                                                                                                                                                                        | <b>Date (Ethiopian calendar):</b>                                                                                                                                                                                                                                                                       |  |
