# Supplementary material for: Effectiveness of a digital medication event reminder and monitor device for patients with tuberculosis (SELFTB): a multicenter randomized controlled trial
Source: Springer Nature journal article supplement (doi:10.1186/s12916-022-02521-y), 2022-09-28
Supplement: MOESM4 [file 23548906]

## መመሪያዎች

### 1. ያጠቃቀም መመሪያዎች

1. መድሃኒት የሚወሰዱበትን ጊዜ ለማስታወስ ሳጥኑ ከድምጽ ጋር በመቀናጀት አረንጓዴ መብራት ያበራል።

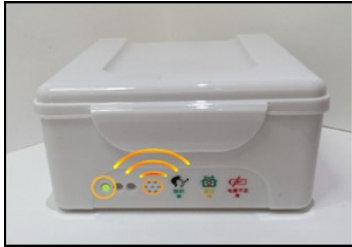

2. መድኃኒቶችን ለመዋጥ መዝጊያ ክዳኑን በማንሳት ሳጥኑን ይክፈቱ።

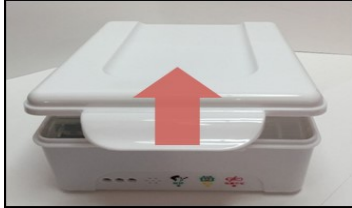

3. ከሐኪም በተነገረው መሰረት መድሃኒትዎን ይዋጡ።

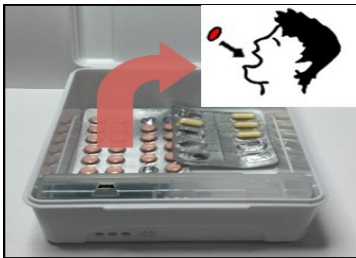

4. መድሃኒትዎን ወስደው ሲጨርሱ ሳጥኑን በመክደን ደህንነቱ በሚጠበቅበት ቦታ ያስቀምጡት።

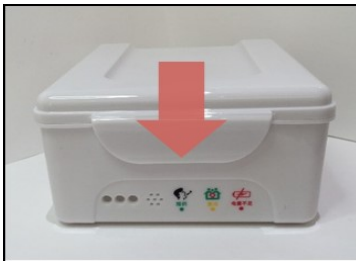

### 2. የሳጥኑ የመብራት ቀለሞች ምንነት

- አረንጓዴ መብራት እና ድምጽ ዕለታዊ መድሃኒት አስታዋሽ ምልክት ነው።
- ቢጫ መብራት መድሃኒትዎ ካለቀ ሕክምና ተቋም ሂደው እንዲሞሉ አስታዋሽ መብራት ነው።
- ቀይ መብራት ዝቅተኛ የባትሪ ማንቂያ ማስጠንቀቂያ ነው።

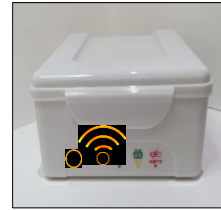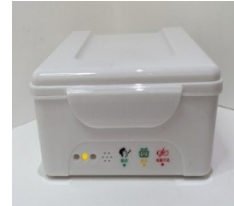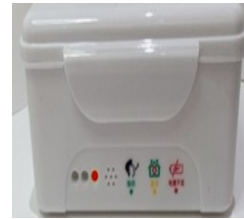

በየትኛውም ሁኔታ ያጋጠሞት ችግር ካለ ከቀጠሮ ቀን በፊትም ቢሆን በሳጥኑ ላይ ባለው ስልክ በመደወል የጤና ባለሙያ ያማክሩ።
