# Supplementary material for: Effectiveness of a digital medication event reminder and monitor device for patients with tuberculosis (SELFTB): a multicenter randomized controlled trial
Source: Springer Nature journal article supplement (doi:10.1186/s12916-022-02521-y), 2022-09-28
Supplement: MOESM5 [file 23548906]

# Treatment adherence monitoring tool

| Adherence monitoring tool (MERM and DOT arms)                                                                                                                                   |   |   |   |   |   |   |   |   |    |                                                                |    |    |    |    |                                                                                     |    |    |    |    |                                                                                                                             |    |    |    |    |    |    |    |    |    |  |
|---------------------------------------------------------------------------------------------------------------------------------------------------------------------------------|---|---|---|---|---|---|---|---|----|----------------------------------------------------------------|----|----|----|----|-------------------------------------------------------------------------------------|----|----|----|----|-----------------------------------------------------------------------------------------------------------------------------|----|----|----|----|----|----|----|----|----|--|
| Participant ID: <input type="checkbox"/> <input type="checkbox"/> <input type="checkbox"/> <input type="checkbox"/> <input type="checkbox"/> <input type="checkbox"/>           |   |   |   |   |   |   |   |   |    | Arm <input type="checkbox"/> MERM <input type="checkbox"/> DOT |    |    |    |    |                                                                                     |    |    |    |    | Health Professional ID: <input type="checkbox"/> <input type="checkbox"/> <input type="checkbox"/> <input type="checkbox"/> |    |    |    |    |    |    |    |    |    |  |
| Adherence follow-up                                                                                                                                                             |   |   |   |   |   |   |   |   |    |                                                                |    |    |    |    |                                                                                     |    |    |    |    |                                                                                                                             |    |    |    |    |    |    |    |    |    |  |
| Month <input type="checkbox"/> 1                                                                                                                                                |   |   |   |   |   |   |   |   |    | <input type="checkbox"/> 2                                     |    |    |    |    |                                                                                     |    |    |    |    |                                                                                                                             |    |    |    |    |    |    |    |    |    |  |
| The patient visited the facility (DOT)/opened the box (MERM) and has taken the medication.<br>Check daily record (DOT)/every 15 days (MERM) and mark √ if taken, X if not taken |   |   |   |   |   |   |   |   |    |                                                                |    |    |    |    |                                                                                     |    |    |    |    |                                                                                                                             |    |    |    |    |    |    |    |    |    |  |
| 1                                                                                                                                                                               | 2 | 3 | 4 | 5 | 6 | 7 | 8 | 9 | 10 | 11                                                             | 12 | 13 | 14 | 15 | 16                                                                                  | 17 | 18 | 19 | 20 | 21                                                                                                                          | 22 | 23 | 24 | 25 | 26 | 27 | 28 | 29 | 30 |  |
|                                                                                                                                                                                 |   |   |   |   |   |   |   |   |    |                                                                |    |    |    |    |                                                                                     |    |    |    |    |                                                                                                                             |    |    |    |    |    |    |    |    |    |  |
| Reason for non-adherence, if any                                                                                                                                                |   |   |   |   |   |   |   |   |    |                                                                |    |    |    |    |                                                                                     |    |    |    |    |                                                                                                                             |    |    |    |    |    |    |    |    |    |  |
| Week 1: Any non-adherence? <input type="checkbox"/> Yes <input type="checkbox"/> No                                                                                             |   |   |   |   |   |   |   |   |    |                                                                |    |    |    |    | Week 2: Any non-adherence? <input type="checkbox"/> Yes <input type="checkbox"/> No |    |    |    |    |                                                                                                                             |    |    |    |    |    |    |    |    |    |  |
| If yes, date/s ..... # of days missed: .....                                                                                                                                    |   |   |   |   |   |   |   |   |    |                                                                |    |    |    |    | If yes, date/s ..... # of days missed: .....                                        |    |    |    |    |                                                                                                                             |    |    |    |    |    |    |    |    |    |  |
| Reason:                                                                                                                                                                         |   |   |   |   |   |   |   |   |    |                                                                |    |    |    |    | Reason:                                                                             |    |    |    |    |                                                                                                                             |    |    |    |    |    |    |    |    |    |  |
| <input type="checkbox"/> Forgetfulness 0                                                                                                                                        |   |   |   |   |   |   |   |   |    |                                                                |    |    |    |    | <input type="checkbox"/> Forgetfulness                                              |    |    |    |    |                                                                                                                             |    |    |    |    |    |    |    |    |    |  |
| <input type="checkbox"/> Drug side-effect1                                                                                                                                      |   |   |   |   |   |   |   |   |    |                                                                |    |    |    |    | <input type="checkbox"/> Drug side-effect                                           |    |    |    |    |                                                                                                                             |    |    |    |    |    |    |    |    |    |  |
| <input type="checkbox"/> Ran out of pills2                                                                                                                                      |   |   |   |   |   |   |   |   |    |                                                                |    |    |    |    | <input type="checkbox"/> Ran out of pills                                           |    |    |    |    |                                                                                                                             |    |    |    |    |    |    |    |    |    |  |
| <input type="checkbox"/> Lack of supporter3                                                                                                                                     |   |   |   |   |   |   |   |   |    |                                                                |    |    |    |    | <input type="checkbox"/> Lack of supporter                                          |    |    |    |    |                                                                                                                             |    |    |    |    |    |    |    |    |    |  |
| <input type="checkbox"/> Feel the dose given is high4                                                                                                                           |   |   |   |   |   |   |   |   |    |                                                                |    |    |    |    | <input type="checkbox"/> Feel the dose given is high                                |    |    |    |    |                                                                                                                             |    |    |    |    |    |    |    |    |    |  |
| <input type="checkbox"/> Finance for food/transport5                                                                                                                            |   |   |   |   |   |   |   |   |    |                                                                |    |    |    |    | <input type="checkbox"/> Finance for food/transport                                 |    |    |    |    |                                                                                                                             |    |    |    |    |    |    |    |    |    |  |
| <input type="checkbox"/> Lack of hope6                                                                                                                                          |   |   |   |   |   |   |   |   |    |                                                                |    |    |    |    | <input type="checkbox"/> Lack of hope                                               |    |    |    |    |                                                                                                                             |    |    |    |    |    |    |    |    |    |  |
| <input type="checkbox"/> Feel drug is not effective7                                                                                                                            |   |   |   |   |   |   |   |   |    |                                                                |    |    |    |    | <input type="checkbox"/> Feel drug is not effective                                 |    |    |    |    |                                                                                                                             |    |    |    |    |    |    |    |    |    |  |
| Week 3: Any non-adherence? <input type="checkbox"/> Yes <input type="checkbox"/> No                                                                                             |   |   |   |   |   |   |   |   |    |                                                                |    |    |    |    | Week 4: Any non-adherence? <input type="checkbox"/> Yes <input type="checkbox"/> No |    |    |    |    |                                                                                                                             |    |    |    |    |    |    |    |    |    |  |
| If yes, date/s ..... # of days missed: .....                                                                                                                                    |   |   |   |   |   |   |   |   |    |                                                                |    |    |    |    | If yes, date/s ..... # of days missed: .....                                        |    |    |    |    |                                                                                                                             |    |    |    |    |    |    |    |    |    |  |
| Reason:                                                                                                                                                                         |   |   |   |   |   |   |   |   |    |                                                                |    |    |    |    | Reason:                                                                             |    |    |    |    |                                                                                                                             |    |    |    |    |    |    |    |    |    |  |
| <input type="checkbox"/> Forgetfulness                                                                                                                                          |   |   |   |   |   |   |   |   |    |                                                                |    |    |    |    | <input type="checkbox"/> Forgetfulness                                              |    |    |    |    |                                                                                                                             |    |    |    |    |    |    |    |    |    |  |
| <input type="checkbox"/> Drug side-effect                                                                                                                                       |   |   |   |   |   |   |   |   |    |                                                                |    |    |    |    | <input type="checkbox"/> Drug side-effect                                           |    |    |    |    |                                                                                                                             |    |    |    |    |    |    |    |    |    |  |
| <input type="checkbox"/> Ran out of pills                                                                                                                                       |   |   |   |   |   |   |   |   |    |                                                                |    |    |    |    | <input type="checkbox"/> Ran out of pills                                           |    |    |    |    |                                                                                                                             |    |    |    |    |    |    |    |    |    |  |
| <input type="checkbox"/> Lack of supporter                                                                                                                                      |   |   |   |   |   |   |   |   |    |                                                                |    |    |    |    | <input type="checkbox"/> Lack of supporter                                          |    |    |    |    |                                                                                                                             |    |    |    |    |    |    |    |    |    |  |
| <input type="checkbox"/> Feel the dose given is high                                                                                                                            |   |   |   |   |   |   |   |   |    |                                                                |    |    |    |    | <input type="checkbox"/> Feel the dose given is high                                |    |    |    |    |                                                                                                                             |    |    |    |    |    |    |    |    |    |  |
| <input type="checkbox"/> Finance for food/transport                                                                                                                             |   |   |   |   |   |   |   |   |    |                                                                |    |    |    |    | <input type="checkbox"/> Finance for food/transport                                 |    |    |    |    |                                                                                                                             |    |    |    |    |    |    |    |    |    |  |
| <input type="checkbox"/> Lack of hope                                                                                                                                           |   |   |   |   |   |   |   |   |    |                                                                |    |    |    |    | <input type="checkbox"/> Lack of hope                                               |    |    |    |    |                                                                                                                             |    |    |    |    |    |    |    |    |    |  |
| <input type="checkbox"/> Feel drug is not effective                                                                                                                             |   |   |   |   |   |   |   |   |    |                                                                |    |    |    |    | <input type="checkbox"/> Feel drug is not effective                                 |    |    |    |    |                                                                                                                             |    |    |    |    |    |    |    |    |    |  |
| Urine pyrazinamide test results every 15 days                                                                                                                                   |   |   |   |   |   |   |   |   |    |                                                                |    |    |    |    |                                                                                     |    |    |    |    |                                                                                                                             |    |    |    |    |    |    |    |    |    |  |
| Urine test result                                                                                                                                                               |   |   |   |   |   |   |   |   |    |                                                                |    |    |    |    | <input type="checkbox"/> Positive <input type="checkbox"/> Negative                 |    |    |    |    |                                                                                                                             |    |    |    |    |    |    |    |    |    |  |
| Urine test result                                                                                                                                                               |   |   |   |   |   |   |   |   |    |                                                                |    |    |    |    | <input type="checkbox"/> Positive <input type="checkbox"/> Negative                 |    |    |    |    |                                                                                                                             |    |    |    |    |    |    |    |    |    |  |
| For DOT arm only                                                                                                                                                                |   |   |   |   |   |   |   |   |    |                                                                |    |    |    |    |                                                                                     |    |    |    |    |                                                                                                                             |    |    |    |    |    |    |    |    |    |  |
| If a patient asks to take additional medication for the next day/s, fill:                                                                                                       |   |   |   |   |   |   |   |   |    |                                                                |    |    |    |    |                                                                                     |    |    |    |    |                                                                                                                             |    |    |    |    |    |    |    |    |    |  |
| Date asked: ..... For how many days asked: ..... Measures taken: .....                                                                                                          |   |   |   |   |   |   |   |   |    |                                                                |    |    |    |    |                                                                                     |    |    |    |    |                                                                                                                             |    |    |    |    |    |    |    |    |    |  |
| Date asked: ..... For how many days asked: ..... Measures taken: .....                                                                                                          |   |   |   |   |   |   |   |   |    |                                                                |    |    |    |    |                                                                                     |    |    |    |    |                                                                                                                             |    |    |    |    |    |    |    |    |    |  |
| Date asked: ..... For how many days asked: ..... Measures taken: .....                                                                                                          |   |   |   |   |   |   |   |   |    |                                                                |    |    |    |    |                                                                                     |    |    |    |    |                                                                                                                             |    |    |    |    |    |    |    |    |    |  |
| Date asked: ..... For how many days asked: ..... Measures taken: .....                                                                                                          |   |   |   |   |   |   |   |   |    |                                                                |    |    |    |    |                                                                                     |    |    |    |    |                                                                                                                             |    |    |    |    |    |    |    |    |    |  |
